# Supplementary material for: Identification of a candidate prognostic gene signature by transcriptome analysis of matched pre- and post-treatment prostatic biopsies from patients with advanced prostate cancer
Source: PubMed Central journal article supplement (PMC4301544; doi:10.1186/1471-2407-14-977), 2014-12-18
Supplement: 12885_2014_5118_MOESM5_ESM.pdf [file 12885_2014_5118_MOESM5_ESM.pdf]

**(A)**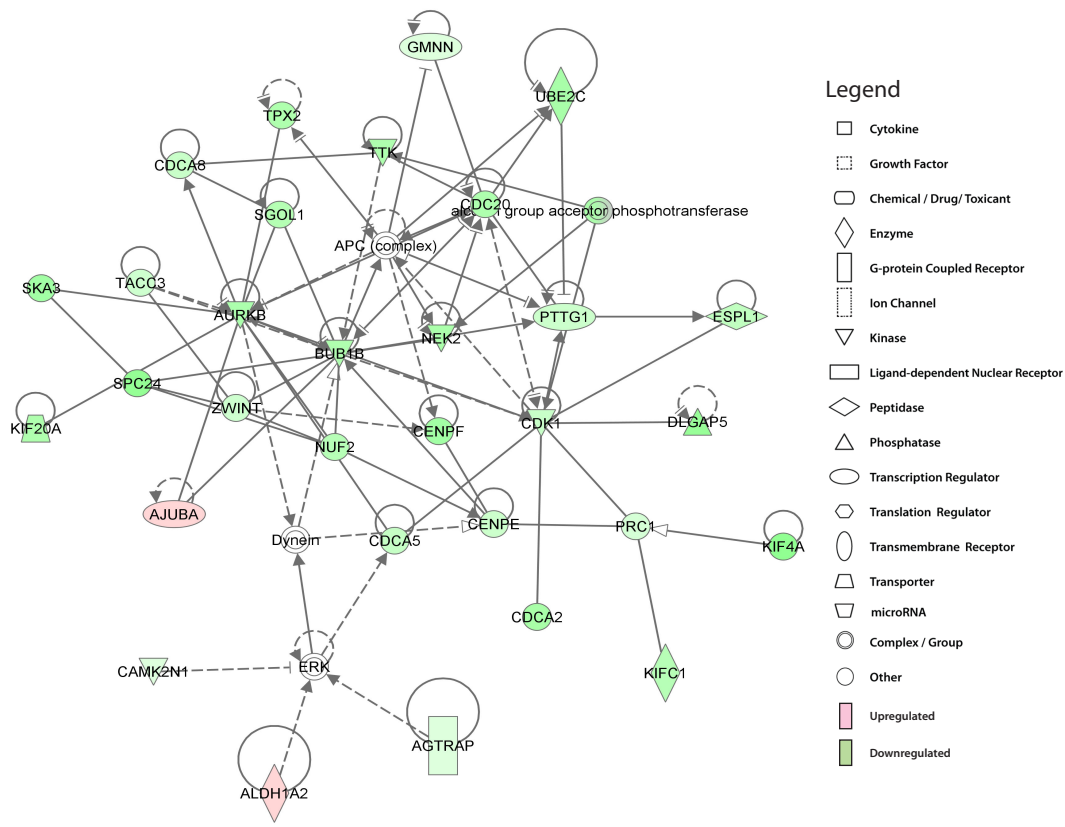**(B)**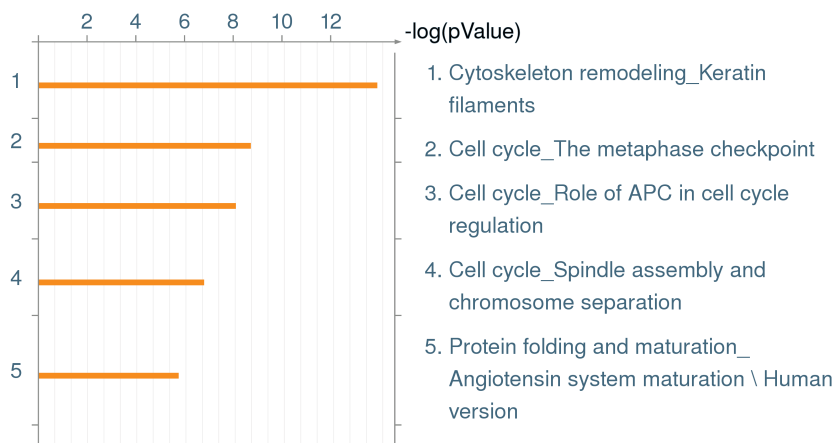**(C)**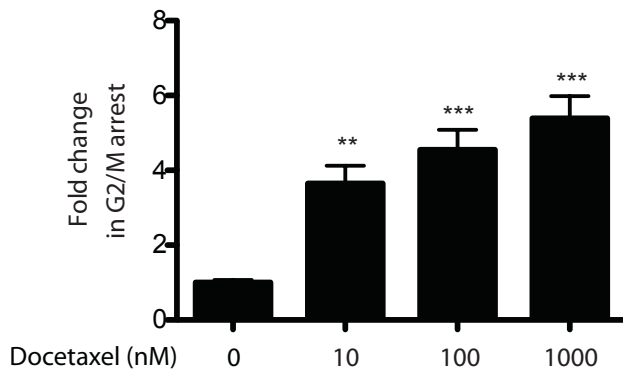**(D)**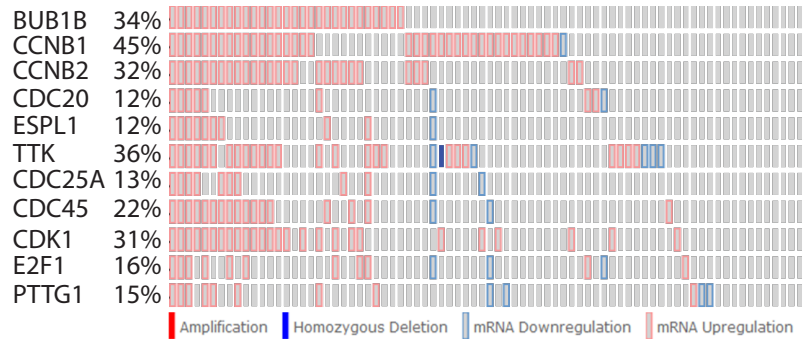**Figure S2**
